# Supplementary material for: Aqueous green synthesis of organic/inorganic nanohybrids with an unprecedented synergistic mechanism for enhanced near-infrared photothermal performance
Source: Royal Society of Chemistry journal article supplement (doi:10.1039/d3bm00495c), 2023-01-01
Supplement: d3bm00495c1.pdf [file d3bm00495c1.pdf]

# Aqueous green synthesis of organic/inorganic nano hybrids with an unprecedented synergistic mechanism for enhanced near-infrared photothermal performance

Xiaobo Nie,<sup>a</sup> Xu Yang,<sup>b</sup> Dongdong Peng,<sup>b</sup> Jun Wang,<sup>b</sup> Suisui He,<sup>b</sup> Cui-Yun Yu<sup>\*b</sup> and  
Hua Wei<sup>\* b</sup>

<sup>a</sup> College of Chemistry and Chemical Engineering, Postdoctoral Mobile Station of Basic Medical  
Science, Hengyang Medical College, University of South China, Hengyang 421001, Hunan, China

<sup>b</sup> Hunan Province Cooperative Innovation Center for Molecular Target New Drug Study, School  
of Pharmaceutical Science, University of South China, Hengyang 421001, Hunan, China

\* Corresponding authors.

E-mail addresses: yucuiyunusc@hotmail.com (C.-Y. Yu), weih@usc.edu.cn (H. Wei).

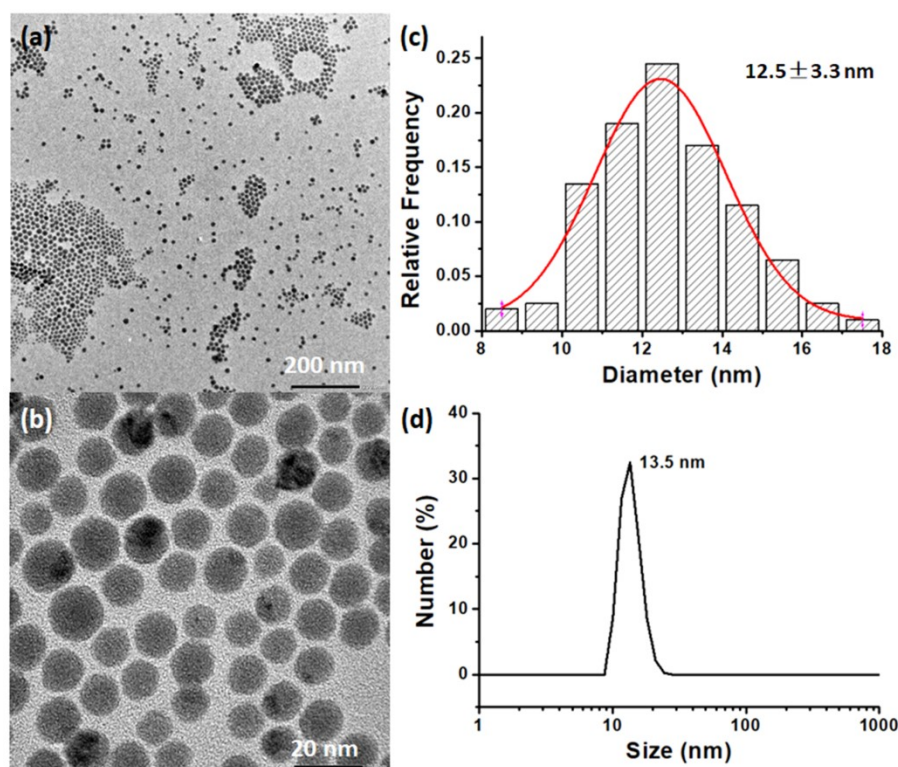

**Fig. S1** TEM images of Ag<sub>2</sub>S nanoparticles at different magnification (a)-(b). Size distribution of Ag<sub>2</sub>S nanoparticles by TEM image statistics (d) and DLS measurement (e).

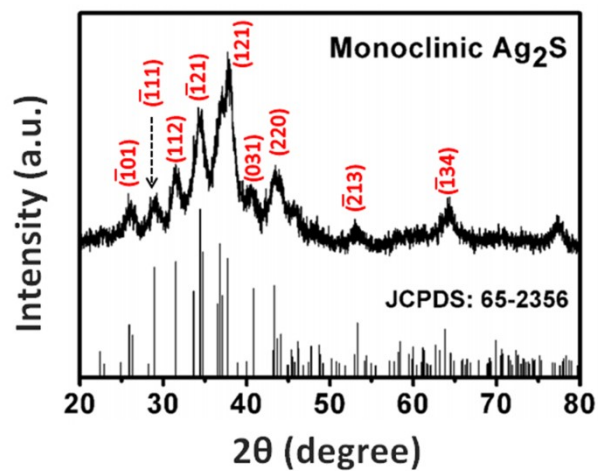

Fig. S2 XRD pattern of the Ag<sub>2</sub>S nanoparticles

Table S1 Mean size and polydispersity index (PDI) of Ag<sub>2</sub>S@PDA nanohybrids prepared at different mass ratio of F127 and SDS.

| Sample   | Mean size (nm) | Std. Dev. | PDI   | Std. Dev. |
|----------|----------------|-----------|-------|-----------|
| F:S=12:0 | 221.3          | 4.460     | 0.036 | 0.018     |
| F:S=9:3  | 192.9          | 2.421     | 0.131 | 0.041     |
| F:S=6:6  | 154.1          | 0.9074    | 0.265 | 0.017     |
| F:S=5:7  | 204.7          | 17.94     | 0.466 | 0.086     |
| F:S=4:8  | 239.7          | 25.34     | 0.565 | 0.062     |
| F:S=3:9  | 288.6          | 25.11     | 0.638 | 0.106     |
| F:S=0:12 | 336.1          | 125.1     | 0.763 | 0.146     |

Note: Red shows that particles with polydispersity cannot pass the DLS test effectively.

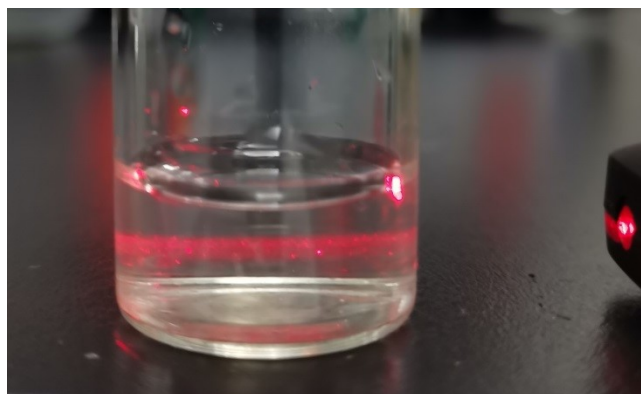

Fig. S3 Red light pathway in the F127 aqueous solution due to the Dunder effect.

**Table S2** Mean size and PDI of Ag<sub>2</sub>S@PDA nano hybrids synthesized in ethanol and water with different volume ratio.

| Sample               | Mean size (nm) | Std. Dev. | PDI   | Std. Dev. |
|----------------------|----------------|-----------|-------|-----------|
| Ethanol:Water = 0:10 | 234.9          | 69.45     | 0.521 | 0.088     |
| Ethanol:Water = 2:8  | 173.0          | 1.493     | 0.235 | 0.025     |
| Ethanol:Water = 4:6  | 228.7          | 4.078     | 0.125 | 0.045     |
| Ethanol:Water = 6:4  | 245.9          | 3.121     | 0.203 | 0.013     |

**Table S3** Solubility parameters, permittivity and boiling point of different solvents.

|                         | TMB   | Toluene | CHCl <sub>3</sub> | Ethanol | Water |
|-------------------------|-------|---------|-------------------|---------|-------|
| $\delta/(J/cm^3)^{1/2}$ | 18.01 | 18.81   | 19.85             | 26.39   | 46.88 |
| $\epsilon$              | 2.40  | 2.37    | 4.81              | 24.3    | 80.4  |
| Tb/°C                   | 167   | 111     | 61                | 78      | 100   |

**Table S4** Mean size and PDI of Ag<sub>2</sub>S@PDA nano hybrids synthesized by using different oil solvent.

| Oil solvent                           | Mean size (nm) | Std. Dev. | PDI   | Std. Dev. |
|---------------------------------------|----------------|-----------|-------|-----------|
| TMB                                   | 181.8          | 3.323     | 0.093 | 0.040     |
| Toluene                               | 188.1          | 7.583     | 0.098 | 0.085     |
| CHCl <sub>3</sub>                     | 273.7          | 1.901     | 0.206 | 0.015     |
| CHCl <sub>3</sub> , no volatilization | 313.4          | 3.044     | 0.476 | 0.046     |

**Table S5** Mean size and PDI of Ag<sub>2</sub>S@PDA nano hybrids synthesized by adding different DA amount.

| DA Addition | Mean size (nm) | Std. Dev. | PDI   | Std. Dev. |
|-------------|----------------|-----------|-------|-----------|
| 0.5 mg      | 653.8          | 45.06     | 0.890 | 0.096     |
| 1 mg        | 400.8          | 45.75     | 0.692 | 0.090     |
| 2 mg        | 205.3          | 4.359     | 0.240 | 0.030     |
| 5 mg        | 221.2          | 10.14     | 0.261 | 0.056     |
| 10 mg       | 270.6          | 2.082     | 0.159 | 0.026     |
| 15 mg       | 276.0          | 0.6557    | 0.124 | 0.075     |

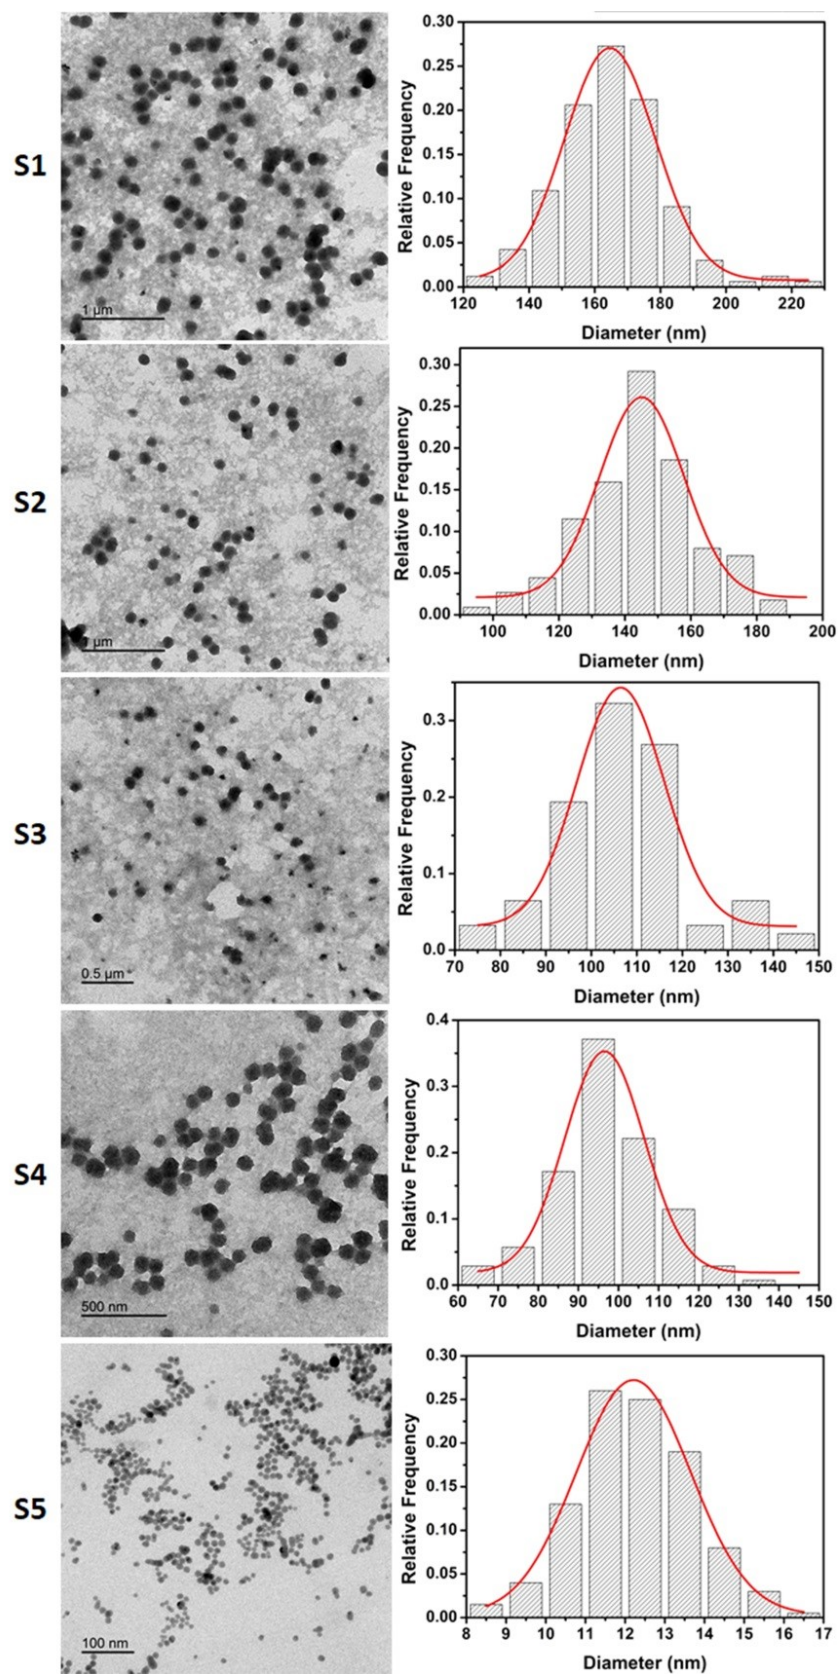

**Fig. S4** TEM images and size distribution of five samples corresponding to **Table 2** (diameter statistics were obtained by counting at least 100 particles).

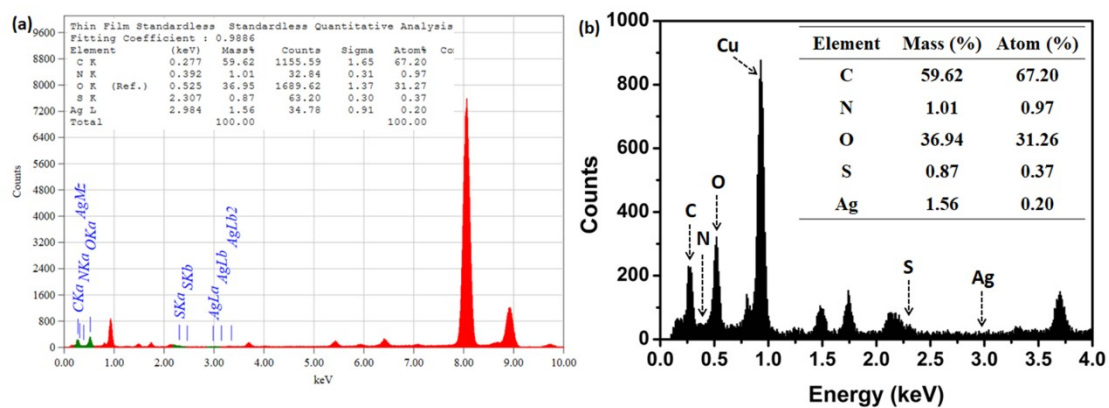

**Fig. S5** Elemental distribution and content of Ag<sub>2</sub>S@PDA nanohybrids: (a) the original picture; (b) the treated picture by Origin software.

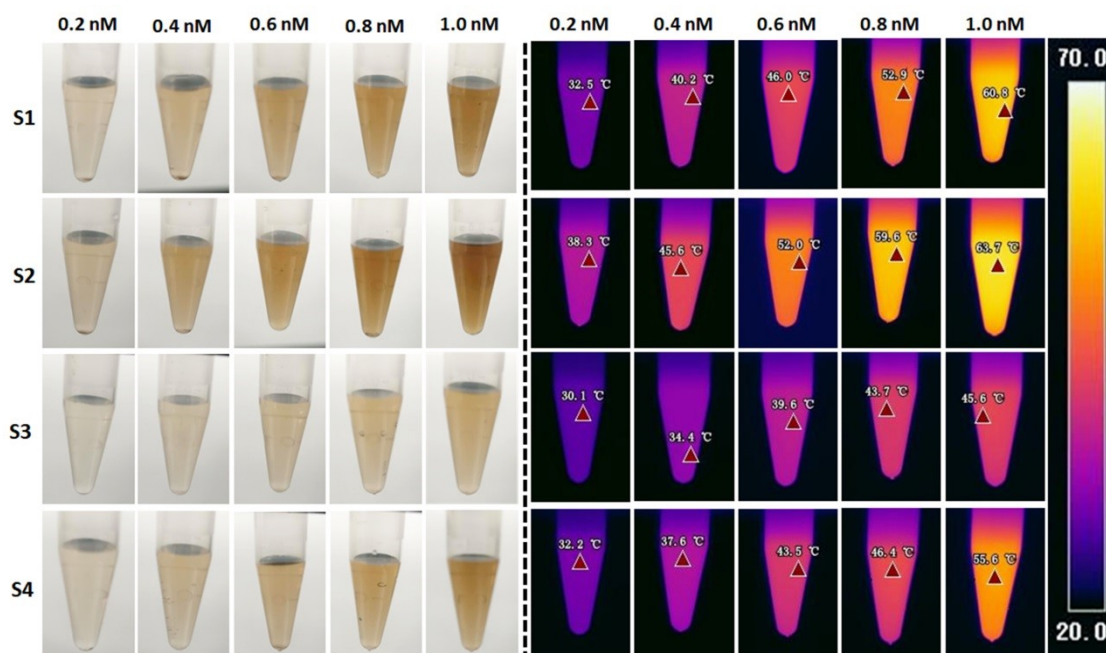

**Fig. S6** Photographs of S1-S4 samples under visible light (left) and their photothermal images under 808 nm (1 W/cm<sup>2</sup>) laser irradiation for 10 min (right) at different molar concentrations.



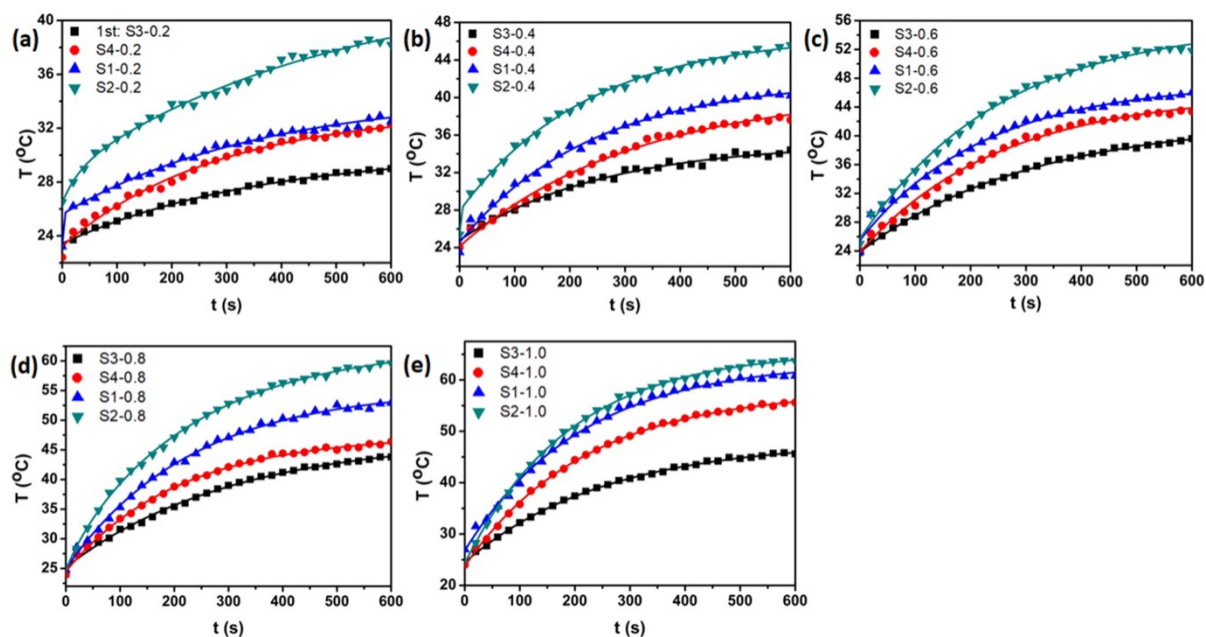

**Fig. S7** Comparison of photothermal effects of S1-S4 samples at different concentrations: (a) 0.2 nM, (b) 0.4 nM, (c) 0.6 nM, (d) 0.8 nM, (e) 1.0 nM.

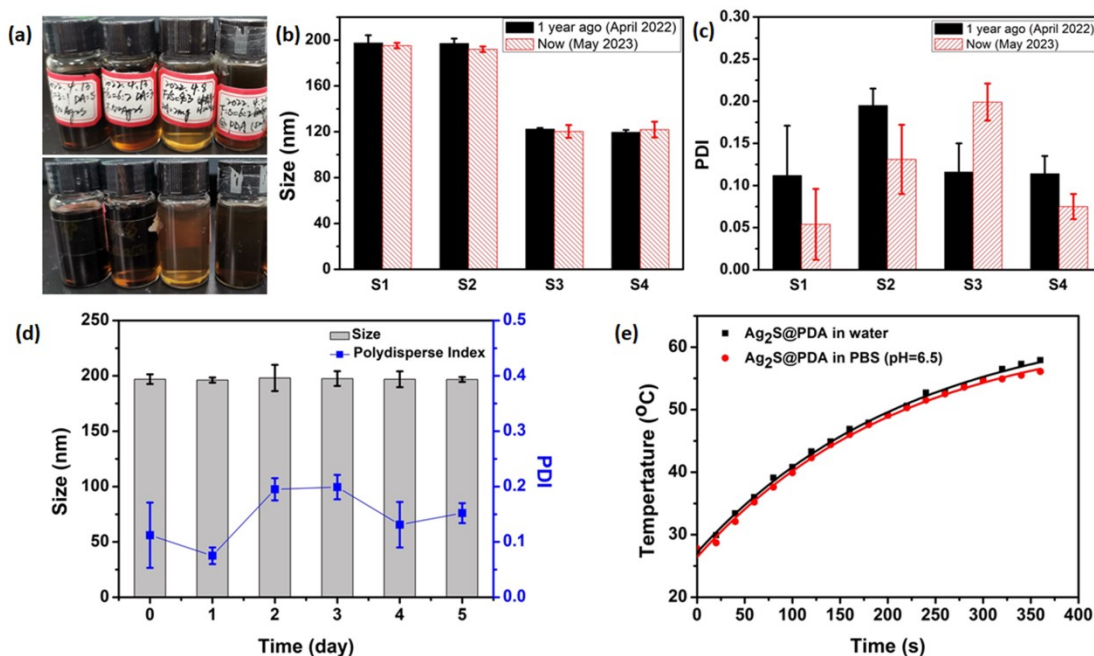

**Fig. S8** (a) Digital pictures of S1-S4 samples in water (the top photo is taken from the front and the bottom is from back): S1 - big PDA particles; S2 - big  $\text{Ag}_2\text{S}@$ PDA nanohybrids; S3 - small PDA particles; S4 - small  $\text{Ag}_2\text{S}@$ PDA nanohybrids. Size comparison (b) and PDI (c) of S1-S4 samples measured in April 2022 and May 2023, respectively. (d) Size and PDI of big-sized  $\text{Ag}_2\text{S}@$ PDA nanohybrids in PBS (pH=6.5). (e) Temperature elevations of big-sized  $\text{Ag}_2\text{S}@$ PDA

in original aqueous solution and in PBS (pH=6.5) after 5 days, respectively. The irradiation by 808 nm laser at 1 W/cm<sup>2</sup> was used. All data were obtained after receiving the reviewers' comments (one year has passed since the preparation of the sample).

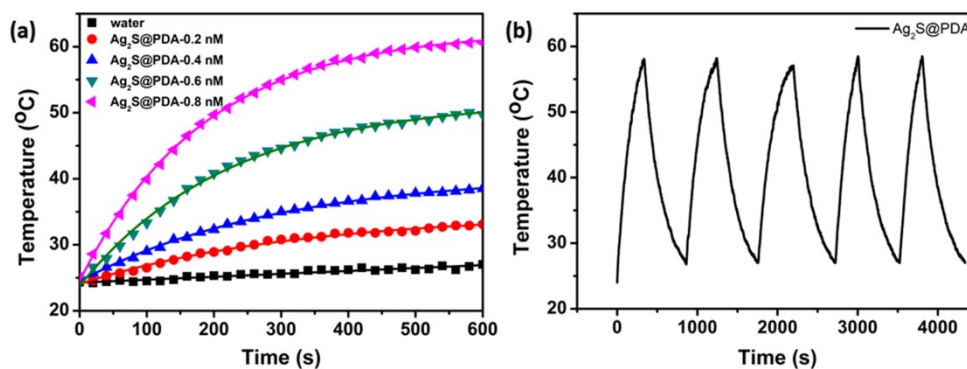

**Fig. S9** (a) Temperature elevations of big-sized Ag<sub>2</sub>S@PDA nanohybrids with different molar concentration under 808 nm (1 W/cm<sup>2</sup>) laser irradiation. (b) Photothermal stability of big-sized Ag<sub>2</sub>S@PDA nanohybrids (0.8 nM) over five cycles of heating-cooling processes upon 808 nm (1 W/cm<sup>2</sup>) laser irradiation. These data were tested after receiving the reviewers' comments (one year has passed since the preparation of the sample).

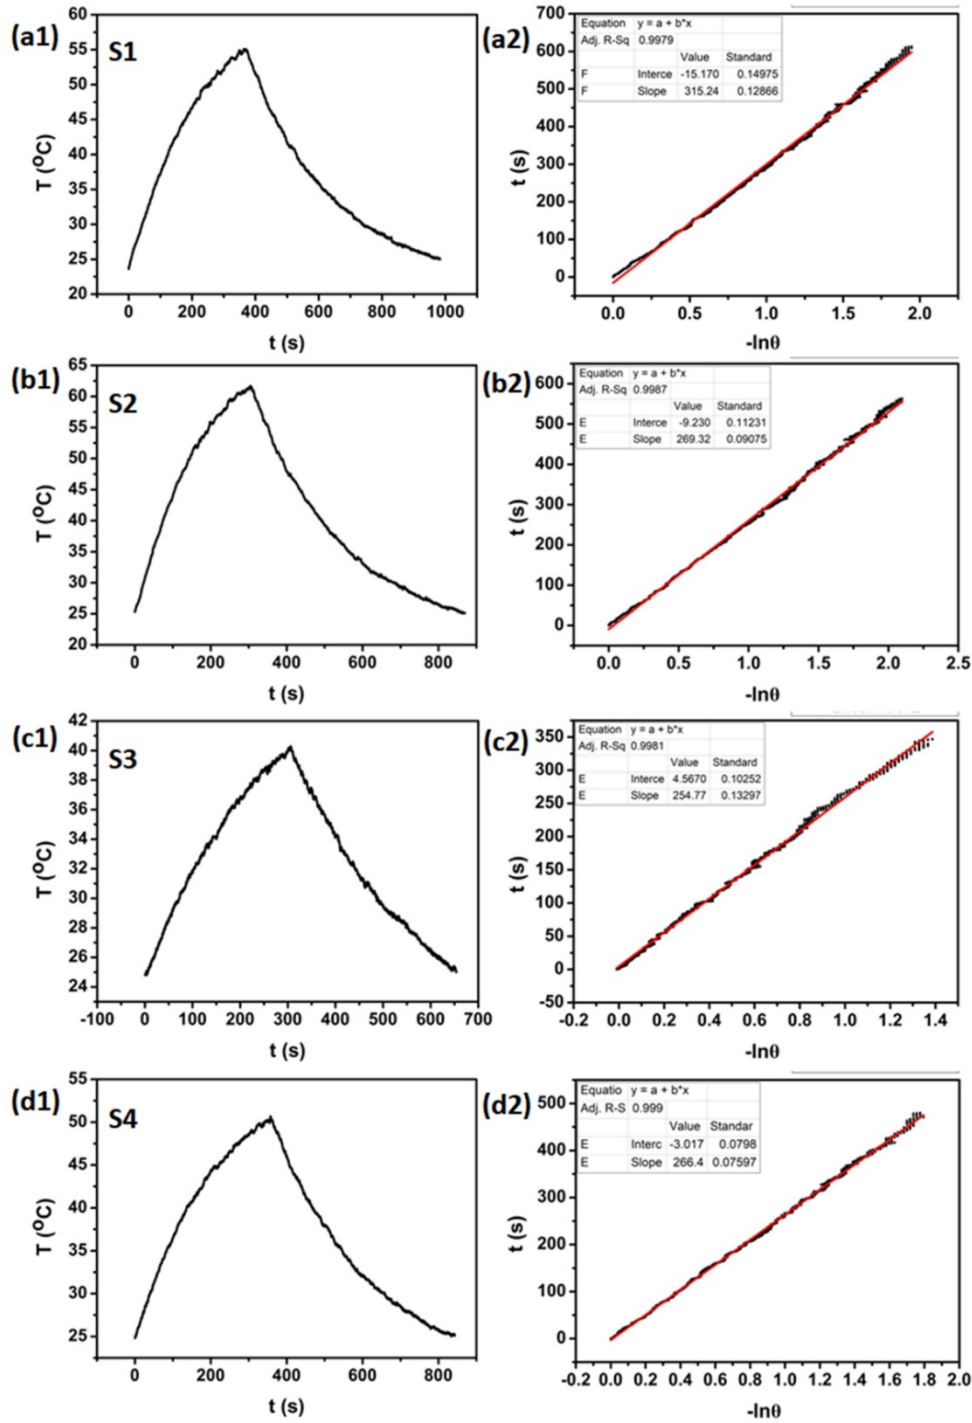

**Fig. S10** The heating-cooling curves of S1-S4 samples (a1-d1) underwent once switch on-off under 808 nm ( $1 \text{ W/cm}^2$ ) laser irradiation. Time versus  $-\ln\theta$  plots (with  $\theta$  being the driving force temperature) obtained using the data recorded during the cooling periods (a2-d2).



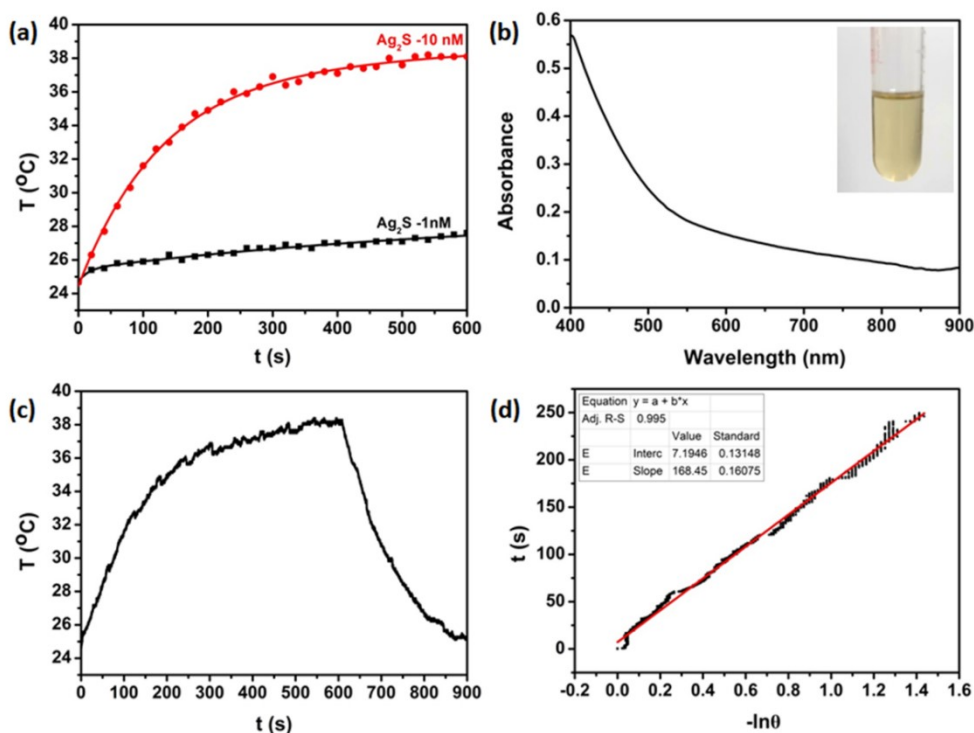

**Fig. S11** (a) Photothermal heating curves of SDS-Ag<sub>2</sub>S nanoparticles with concentrations of 1.0 and 10 nmol L<sup>-1</sup> under 808 nm (1 W/cm<sup>2</sup>) laser irradiation for 10 min. (b) The visible-NIR absorption spectrum of SDS-Ag<sub>2</sub>S nanoparticles at 10 nM (upper right corner is the digital photograph of the sample). (c) The heating-cooling curve of SDS-Ag<sub>2</sub>S nanoparticles (10 nM) underwent once switch on-off under 808 nm (1 W/cm<sup>2</sup>) laser irradiation. (d) Time versus -lnθ plot obtained using the data recorded during the cooling period in (c).

**Table S6** Average CI interval and interaction evaluation of combined compound

| Average CI interval | Level of interaction |
|---------------------|----------------------|
| $CI < 0.1$          | +++++                |
| $0.1 < CI < 0.3$    | ++++                 |
| $0.3 < CI < 0.7$    | +++                  |
| $0.7 < CI < 0.85$   | ++                   |
| $0.85 < CI < 0.90$  | +                    |
| $0.90 < CI < 1.10$  | ±                    |
| $1.10 < CI < 1.20$  | -                    |
| $1.20 < CI < 1.45$  | --                   |
| $1.45 < CI < 3.30$  | ---                  |
| $3.30 < CI < 10$    | ----                 |
| $CI > 10$           | -----                |

Note: “+” and “-” represent the synergistic effect and antagonistic effect, respectively.

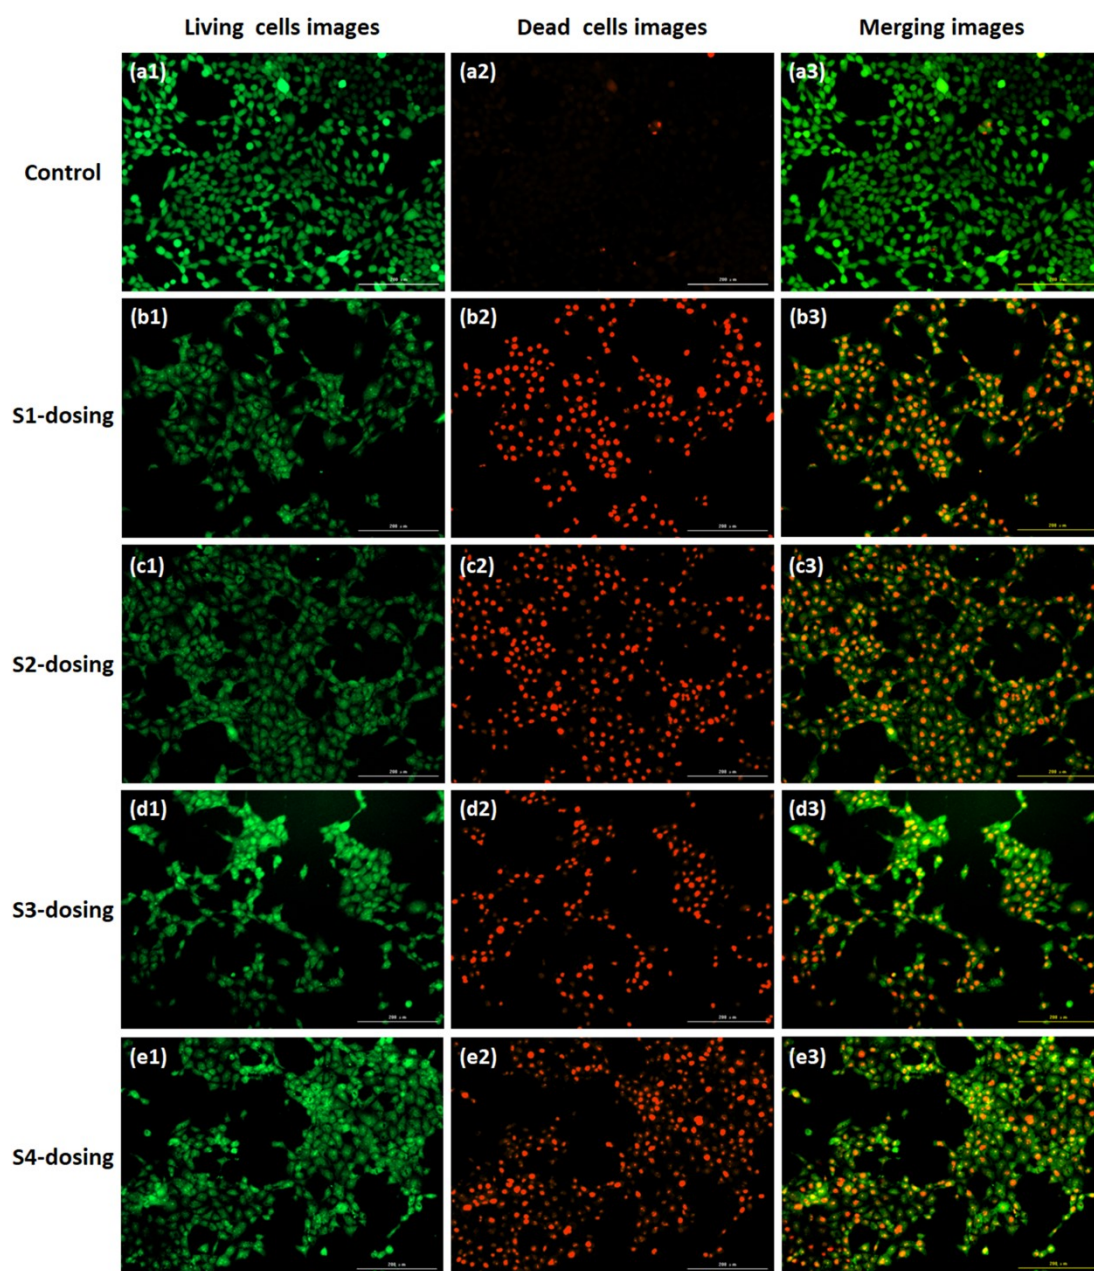

**Fig. S12** Fluorescence images of 4T1 cells after calcein-AM/PI double staining: (a) control group; (b) dosing group by 1.0 nM S1 sample; (c) dosing group by 1.0 nM S2 sample; (d) dosing group by 1.0 nM S3 sample; (e) dosing group by 1.0 nM S4 sample. All samples were irradiated by 808 nm (1 W/cm<sup>2</sup>) laser for 10 min before imaging. All scale bars are 200  $\mu$ m.
